## Exercise intensity is associated with progression of coronary artery calcification in middle-aged and older athletes: findings from the MARC-2 study

Aengevaeren V.<sup>1</sup>; Mosterd A.<sup>2</sup>; Braber TL.<sup>3</sup>; Sharma S.<sup>4</sup>; Nathoe HM.<sup>5</sup>; Velthuis BK.<sup>5</sup>; Eijsvogels TMH<sup>1</sup>

<sup>1</sup>Radboud University Medical Center, Nijmegen, Netherlands (The)

<sup>2</sup>Meander Medical Center, Amersfoort, Netherlands (The)

<sup>3</sup>Isala Hospital, Zwolle, Netherlands (The)

<sup>4</sup>St George's University of London, London, United Kingdom of Great Britain & Northern Ireland

<sup>5</sup>University Medical Center Utrecht, Utrecht, Netherlands (The)

**Funding Acknowledgements:** Type of funding sources: Foundation. Main funding source(s): Dutch Heart Foundation

### Background

Recent studies have reported increased coronary artery calcification (CAC) in middle-aged male athletes, which is related to the amount and intensity of lifelong exercise. However, previous studies are limited by their cross-sectional study design.

### Purpose

We prospectively assessed progression of CAC and its association to exercise volume and intensity in middle-aged and older athletes.

### Methods

318 asymptomatic middle-aged and older men were recruited in the Measuring Athlete's Risk of Cardiovascular events (MARC) study between 2012-2014 and invited for follow-up (MARC-2) between 2019-2020. During both study visits, computed tomography imaging was performed to assess CAC. Exercise characteristics during follow-up were used to calculate exercise volumes (Metabolic equivalent of task [MET]-hours/week), whereas intensities were classified as moderate (3-6 MET), vigorous (6-9 MET) and very vigorous (>9 MET). For linear regression analyses, CAC scores were transformed (Ln delta CAC score + 1) and analyses were adjusted for baseline confounders, CAC at baseline and time between CT scans. Exercise intensities were assessed as proportion of MET-hrs/week and separately included, while adjusting for exercise volume.

### Results

We included 289 men (54.9 ± 6.4 years) for MARC-2, with a follow-up of 6.3 ± 0.5 years. Participants exercised for 41 [25-57] MET-hrs/week, of which the median percentage was 0% [interquartile range 0-19] at moderate, 44% [0-84] at vigorous and 34% [0-80] at very vigorous intensity. At baseline, CAC was present in 151 (52%) men, and increased to 205 (71%) men at follow-up. CAC scores increased from 1 [0-32] to 31 [0-132]. Delta CAC score (26 [0-104]) was not associated with overall exercise volume. However, delta CAC score was negatively associated with vigorous intensity exercise and positively associated with very vigorous intensity exercise (Table).

### Conclusion

Progression of CAC was not associated with overall exercise volume during 6-year follow-up. However, the degree of vigorous intensity exercise was associated with attenuated CAC progression, whereas very vigorous intensity exercise was associated with accelerated CAC progression.

Linear regression analyses

| Progression of CAC (Ln Delta CAC score +1) | B (95% CI)           | P-Value |
|--------------------------------------------|----------------------|---------|
| Exercise volume (MET-hours/week)           | .001 (-.005 - .008)  | .70     |
| Exercise Intensity                         |                      |         |
| Moderate intensity (%)                     | -.002 (-.009 - .005) | .65     |
| Vigorous intensity (%)                     | -.005 (-.009 - .000) | .03     |
| Very vigorous intensity (%)                | .005 (.001 - .009)   | .02     |
